# Supplementary material
Source: PubMed Central journal article supplement (PMC6537843)

## Supplementary Online Content

Cho YS, Park SY, Seol HY, et al. Clinical Performance Evaluation of a Personal Sound Amplification Product vs a Basic Hearing Aid and a Premium Hearing Aid. *JAMA Otolaryngol Head Neck Surg*. Published online May 16, 2019. doi:10.1001/jamaoto.2019.0667

**eTable 1.** Test device features

**eFigure 1.** Sound quality questionnaire survey by each hearing group

This supplementary material has been provided by the authors to give readers additional information about their work.

1 **eTable 1. Test Device Features**

|                    | <b>Premium HA<sup>a</sup></b> | <b>Basic HA<sup>b</sup></b> | <b>PSAP<sup>c</sup></b> |
|--------------------|-------------------------------|-----------------------------|-------------------------|
| Channel            | 64                            | 6                           | 8                       |
| Price <sup>d</sup> | \$6,200                       | \$3,000                     | \$450                   |
| Type               | RIC                           | RIC                         | RIC                     |

2 Abbreviations: HA, Hearing aid; PSAP, Personal sound amplifier product; RIC, Receiver in the canal

3 <sup>a</sup>The premium HA was fitted with the NAL-NL2 formula (Oticon Opn1™).

4 <sup>b</sup>The basic HA was also fitted with the NAL-NL2 formula ( Oticon Ria2pro™ ).

5 <sup>c</sup>The PSAP was Able Planet Company (Wheat Ridge, CO)'s PS2500AMP™.

6 <sup>d</sup>Based on the price list distributed by the HA company; PSAP is the actual online purchase price

7

eFigure 1. Sound quality questionnaire survey by each group. Mild hearing loss (a), Moderate hearing loss (b), Moderately severe hearing loss (c)

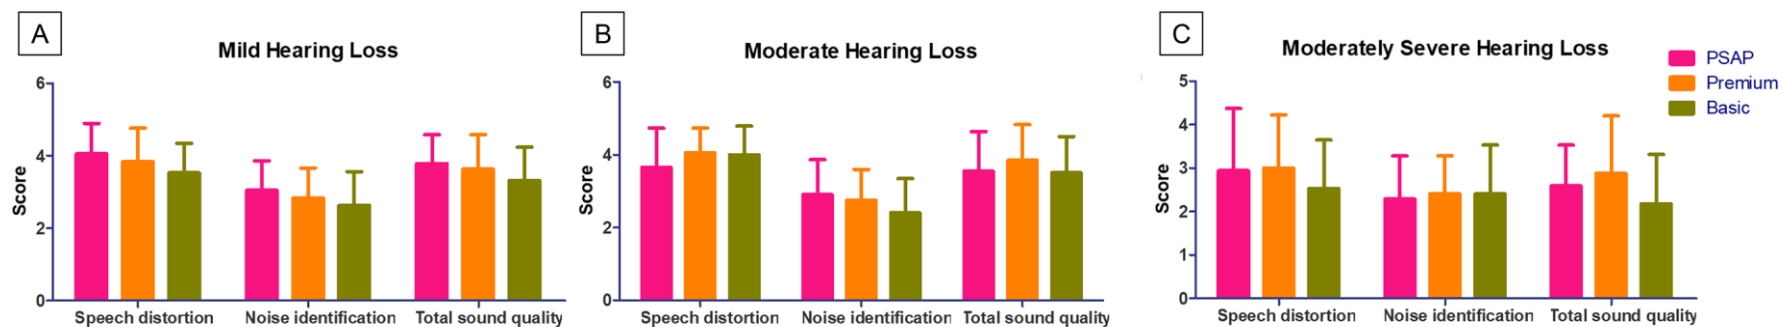

Supplement: jamaotolaryngolheadnecksurg-145-516-s001.pdf [file jamaotolaryngolheadnecksurg-145-516-s001.pdf]
